# Supplementary material for: TrkB-enhancer facilitates functional recovery after traumatic brain injury
Source: PubMed Central journal article supplement (PMC5591207; doi:10.1038/s41598-017-11316-8), 2017-09-08
Supplement: 41598_2017_11316_MOESM1_ESM.pdf [file 41598_2017_11316_MOESM1_ESM.pdf]

## **TrkB-enhancer facilitates functional recovery after traumatic brain injury**

**John Marshall<sup>1</sup>, Joanna Szmydynger-Chodobska<sup>2</sup>, Mengia S Rioult-Pedotti<sup>1</sup>, Kara Lau<sup>1</sup>, Andrea T. Chin<sup>2</sup>, Siva K. Reddy Kotla<sup>3</sup>, Rakesh Kumar Tiwari<sup>3</sup>, Keykavous Parang<sup>3</sup>, Steven W. Threlkeld<sup>4</sup> and Adam Chodobski<sup>2</sup>**

<sup>1</sup>Department of Molecular Pharmacology, Physiology, and Biotechnology, Brown University, Providence, RI 02912, USA.

<sup>2</sup>Neurotrauma and Brain Barriers Research Laboratory, Department of Emergency Medicine, Alpert Medical School of Brown University, Providence, RI 02903, USA.

<sup>3</sup>Center for Targeted Drug Delivery, Department of Biomedical & Pharmaceutical Sciences, Chapman University School of Pharmacy, Irvine, CA 92618, USA.

<sup>4</sup>Department of Neuroscience, Regis College, Weston, MA 02493, USA.

To whom correspondence should be addressed: John Marshall, Ph.D. Email: [John\\_Marshall@Brown.edu](mailto:John_Marshall@Brown.edu)

**Supplementary Figures and Figure legends**

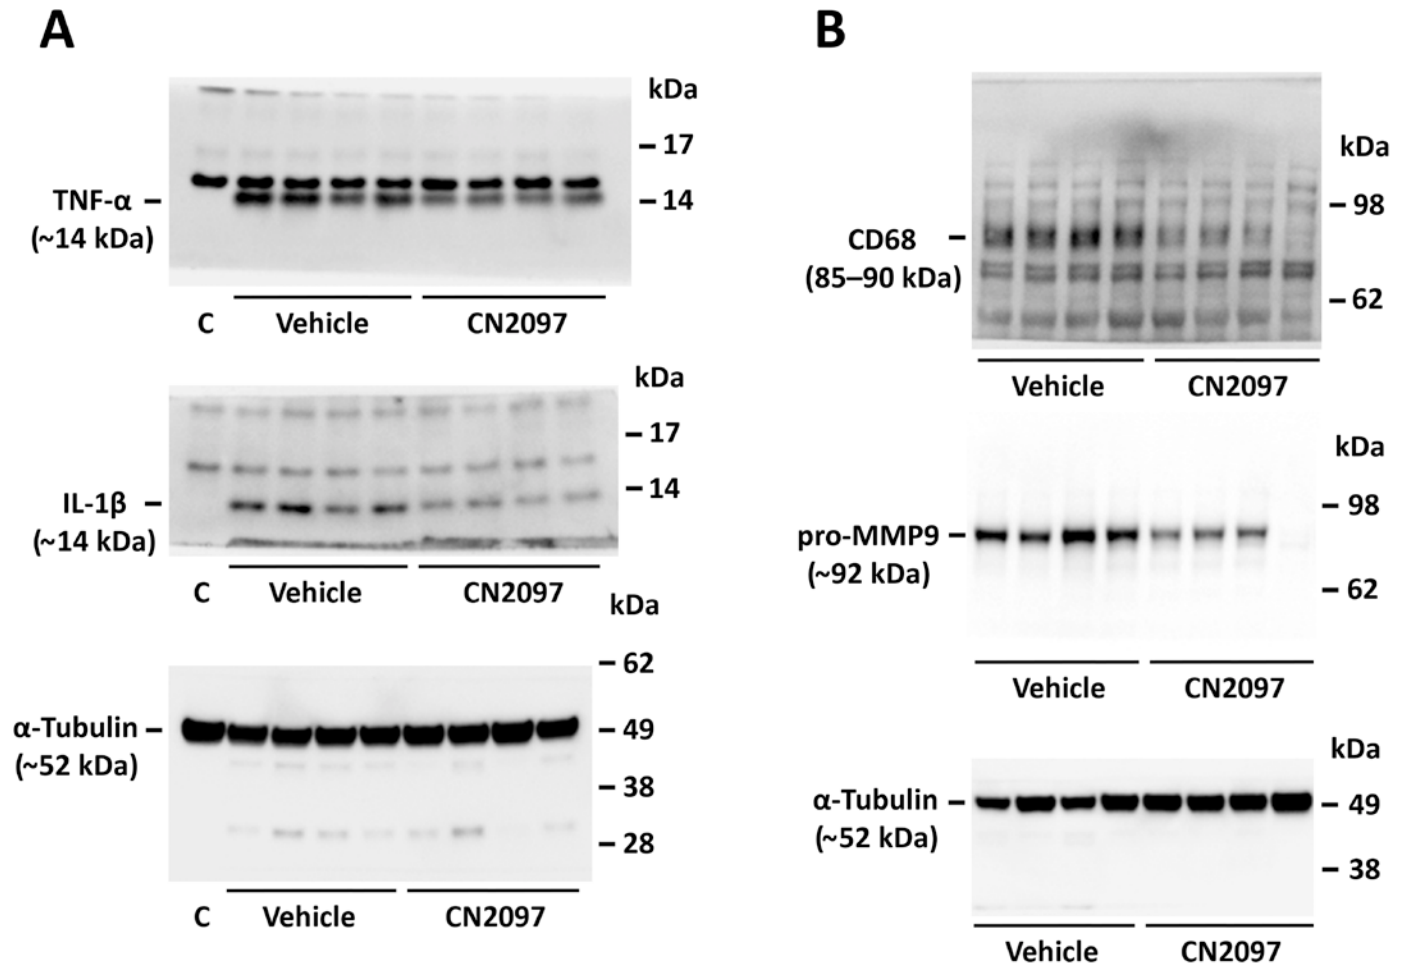

**Figure S1.** The original full-length Western blot images for Figure 1. Therapeutic efficacy of CN2097 in reducing post-traumatic neuroinflammation in the injured cerebral cortex.

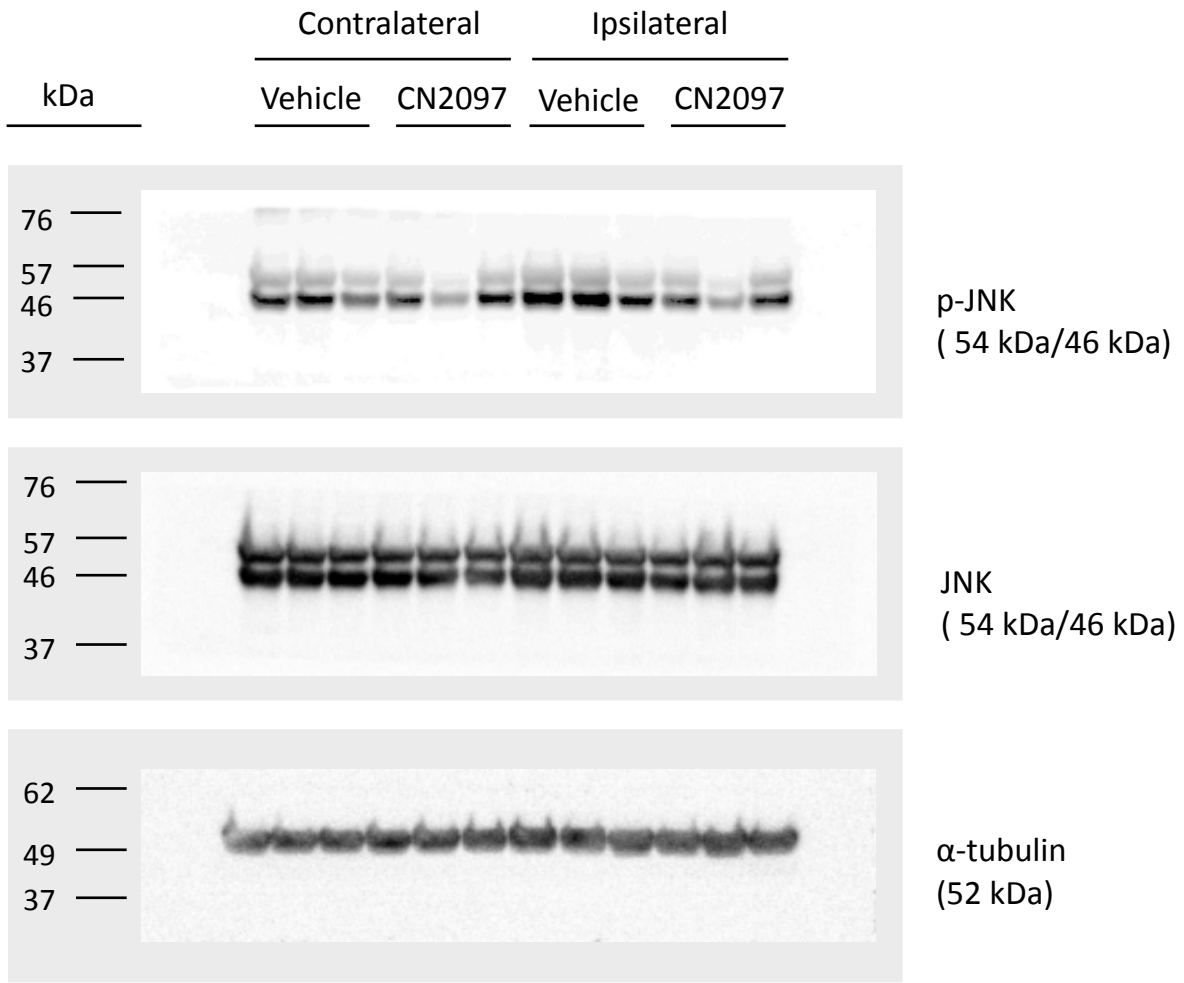

**Figure S2.** The original full-length Western blot images for Figure 2. CN2097 reduces JNK activity in the injured ipsilateral hippocampus.
